# Supplementary material
Source: PubMed Central journal article supplement (PMC7164819)
Supplement: mmc1.pdf [file mmc1.pdf]

# THE LANCET

## Respiratory Medicine

### Supplementary appendix

This appendix formed part of the original submission and has been peer reviewed. We post it as supplied by the authors.

Supplement to: Goodman D, Crocker ME, Pervaiz F, et al, for the HAPIN Investigators. Challenges in the diagnosis of paediatric pneumonia in intervention field trials: recommendations from a pneumonia field trial working group. *Lancet Respir Med* 2019; published online Oct 4. [https://doi.org/10.1016/S2213-2600\(19\)30249-8](https://doi.org/10.1016/S2213-2600(19)30249-8).

**Household Air Pollution Intervention Network (HAPIN) Investigators (listed in alphabetical order)**

**HAPIN Steering Committee:** Kalpana Balakrishnan (Sri Ramachandra Institute for Higher Education and Research, Chennai, India), William Checkley (Johns Hopkins University, Baltimore, MD, USA), Thomas Clasen (Emory University, Atlanta, GA, USA), John McCracken (Universidad del Valle de Guatemala, Guatemala City, Guatemala), Jennifer Peel (Colorado State University, Ft. Collins, CO, USA), Ghislaine Rosa (London School of Hygiene and Tropical Medicine, London, UK), Joshua Rosenthal PhD (Fogarty International Center, National Institutes of Health, Bethesda, MD, USA), Kyle Steenland (Emory University, Atlanta, GA, USA), Lisa Thompson (Emory University, Atlanta, GA, USA).

**HAPIN India research centre:** Vigneswari Aravindalochanan (Sri Ramachandra Institute for Higher Education and Research, Chennai, India), Kalpana Balakrishnan (Sri Ramachandra Institute for Higher Education and Research, Chennai, India), Sarada Garg (Sri Ramachandra Institute for Higher Education and Research, Chennai, India), Gurusamy Thangavel (Sri Ramachandra Institute for Higher Education and Research, Chennai, India), Krishnendu Mukhopadhyay (Sri Ramachandra Institute for Higher Education and Research, Chennai, India), Naveen Puttaswamy (Sri Ramachandra Institute for Higher Education and Research, Chennai, India), Sankar Sambandam (Sri Ramachandra Institute for Higher Education and Research, Chennai, India),

**HAPIN Guatemala research centre:** Oscar De Leon (Universidad del Valle de Guatemala, Guatemala City, Guatemala), Erick Mollinedo (Universidad del Valle de Guatemala, Guatemala City, Guatemala), Anaité Diaz (Universidad del Valle de Guatemala, Guatemala City, Guatemala), Irma Sayury Pineda Fuentes (Universidad del Valle de Guatemala, Guatemala City, Guatemala), (John McCracken (Universidad del Valle de Guatemala, Guatemala City, Guatemala), Lisa Thompson (Emory University, Atlanta, GA, USA).

**HAPIN Peru research centre:** Vanessa Burrowes (Johns Hopkins University, Baltimore, MD, USA), Eduardo Canuz (Asociación Benéfica PRISMA, Lima, Peru), William Checkley (Johns Hopkins University, Baltimore, MD, USA), Marilú Chiang (Asociación Benéfica PRISMA, Lima, Peru), Juan Gabriel Espinoza (Asociación Benéfica PRISMA, Lima, Peru), Stella Hartinger (Universidad Peruana Cayetano Heredia, Lima, Peru), Phabiola Herrera (Johns Hopkins University, Baltimore, MD, USA), Margaret Laws (Johns Hopkins University, Baltimore, MD, USA), Lawrence Moulton (Johns Hopkins University, Baltimore, MD, USA), Suzanne Simkovich (Johns Hopkins University, Baltimore, MD, USA), Lindsay Underhill (Johns Hopkins University, Baltimore, MD, USA), Kendra Williams (Johns Hopkins University, Baltimore, MD, USA).

**HAPIN Rwanda research centre:** Jean de Dieu Ntivuguruzwa (Eagle Research Center, Kayonza, Rwanda), Miles Kirby (Emory University, Atlanta, GA, USA), Fiona Majorin (London School of Hygiene and Tropical Medicine, London, UK), Abidan Nambajimana (Eagle Research Center, Kayonza, Rwanda), Florian Ndagijimana (Eagle Research Center, Kayonza, Rwanda), Ghislaine Rosa (London School of Hygiene and Tropical Medicine, London, UK), Jean Uwizeyimana (Eagle Research Center, Kayonza, Rwanda).

**HAPIN Behavioral Economics Core:** Steven Harvey (Johns Hopkins University, Baltimore, MD, USA), Marjorie Howard (Emory University, Atlanta, GA, USA), J. Jaime Miranda (Universidad Peruana Cayetano Heredia, Lima, Peru), Elisa Puzzolo (Global LPG Partnership, New York, NY, USA), Ashlinn Quinn PhD (Fogarty International Center, National Institutes of Health, Bethesda, MD, USA), Zoe Sakas (London School of Hygiene and Tropical Medicine, London, UK), Kendra Williams (Johns Hopkins University, Baltimore, MD, USA)

**HAPIN Biomarker Core:** Dana Barr (Emory University, Atlanta, GA, USA), Julia McPeck Campbell (Emory University, Atlanta, GA, USA), Maggie Clark (Colorado State University, Ft. Collins, CO, USA), Savannah

Gupton (Emory University, Atlanta, GA USA), Sarah Rajkumar (Colorado State University, Ft. Collins, CO, USA), Barry Ryan (Emory University, Atlanta, GA, USA), Bonnie Young (Colorado State University, Ft. Collins, CO, USA).

**HAPIN Data Management Core:** Howard Chang (Emory University, Atlanta, GA, USA), Yunyun Chen (Emory University, Atlanta, GA, USA), Lisa Elon (Emory University, Atlanta, GA, USA), Lindsay Jaacks (Harvard University, Cambridge, MA, USA), Shirin Jabbarzadeh (Emory University, Atlanta, GA, USA), Amy Lovvorn (Emory University, Atlanta, GA, USA), Azhar Nizam (Emory University, Atlanta, GA, USA), Amit Verma (Emory University, Atlanta, GA, USA), Lance Waller (Emory University, Atlanta, GA, USA).

**HAPIN Clinical and Imaging Core:** William Checkley (Johns Hopkins University, Baltimore, MD, USA), Rachel Craik (University of Oxford, Oxford, UK), Rachel Merrick (Washington University in St. Louis, St. Louis, MO, USA), Victor Davila-Roman (Washington University in St. Louis, St. Louis, MO, USA), Lisa de la Fuentes (Washington University in St. Louis, St. Louis, MO, USA), Aris Papageorghiou (University of Oxford, Oxford, UK), Ashley Toenjes (Washington University in St. Louis, St. Louis, MO, USA)

**HAPIN Exposure Core:** Michael Johnson (Berkeley Air Monitoring Group, Berkeley, CA, USA), Jiawen Liao (Emory University, Atlanta, GA, USA), Luke Naeher (University of Georgia, Athens, GA, USA), Ricardo Piedrahita (Berkeley Air Monitoring Group, Berkeley, CA, USA), Ajay Pillarisetti (University of California, Berkeley, CA, USA), Jeremy Sarnat (Emory University, Atlanta, GA, USA), Kirk Smith (University of California, Berkeley, Berkeley, CA, USA),

**HAPIN Nutrition Working Group:** Marilú Chiang (Asociación Benéfica PRISMA, Lima, Peru), Anaité Diaz (Universidad del Valle de Guatemala, Guatemala City, Guatemala), Lindsay Jaacks (Harvard University, Cambridge, MA, USA), Miles Kirby (Emory University, Atlanta, GA, USA), Usha Ramakrishnan (Emory University, Atlanta, GA, USA), Lisa Thompson (Emory University, Atlanta, GA, USA), Sheela Sinharoy (Emory University, Atlanta, GA, USA).

**HAPIN Pneumonia Working Group:** William Checkley (Johns Hopkins University, Baltimore, MD, USA), Thomas Clasen (Emory University, Atlanta, GA, USA), Mary Crocker (University of Washington, Seattle, WA, USA), Dina Goodman (Johns Hopkins University, Baltimore, MD, USA), Shakir Hossen (Johns Hopkins University, Baltimore, MD, USA), Miles Kirby (Emory University, Atlanta, GA, USA), Eric McCollum (Johns Hopkins University, Baltimore, MD, USA), John McCracken (Universidad del Valle de Guatemala, Guatemala City, Guatemala), Jennifer Peel (Colorado State University, Ft. Collins, CO, USA), Ghislaine Rosa (London School of Hygiene and Tropical Medicine, London, UK), Suzanne Simkovich (Johns Hopkins University, Baltimore, MD, USA), Kyle Steenland (Emory University, Atlanta, GA, USA), Sarada Garg (Sri Ramachandra Institute for Higher Education and Research, Chennai, India), Gurusamy Thangavel (Sri Ramachandra Institute for Higher Education and Research, Chennai, India), Lisa Thompson (Emory University, Atlanta, GA, USA).

**HAPIN Project Management:** Eduardo Canuz (Asociación Benéfica PRISMA, Lima, Peru), Anaité Diaz (Universidad del Valle de Guatemala, Guatemala City, Guatemala), Margaret Laws (Johns Hopkins University, Baltimore, MD, USA), Amy Lovvorn (Emory University, Atlanta, GA, USA), Phabiola Herrera (Johns Hopkins University, Baltimore, MD, USA), Gurusamy Thangavel (Sri Ramachandra Institute for Higher Education and Research, Chennai, India), Jean Uwizeyimana (Eagle Research Center, Kayonza, Rwanda).
